# Supplementary material
Source: PubMed Central journal article supplement (PMC2562713)
Supplement: NIHMS49325-supplement-Arrays.pdf [file NIHMS49325-supplement-Arrays.pdf]

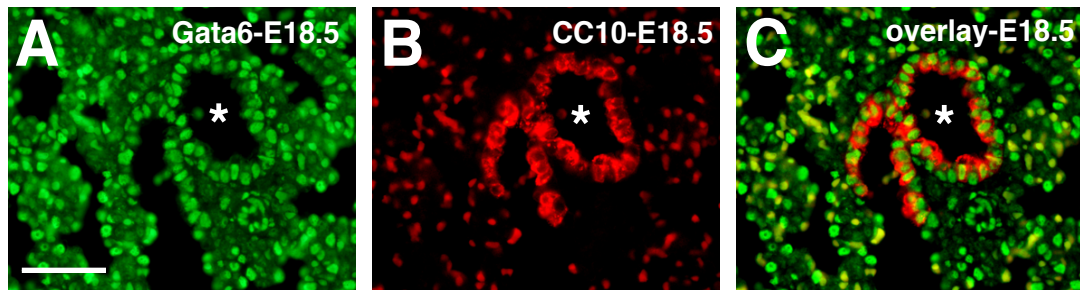

**Supplemental Figure 1. Expression of Gata6 in airway epithelium.**

Immunohistochemistry was performed on E18.5 mouse lung tissue. Gata6 expression (A and C, green) was observed in both proximal (asterisk) and more distal airway epithelium. CC10 expression (B and C, red) is observed only in proximal airway epithelium. An overlay of the expression of these two proteins reveals Gata6 expression in CC10 positive proximal airway epithelium (C). Scale bars=50  $\mu$ m.

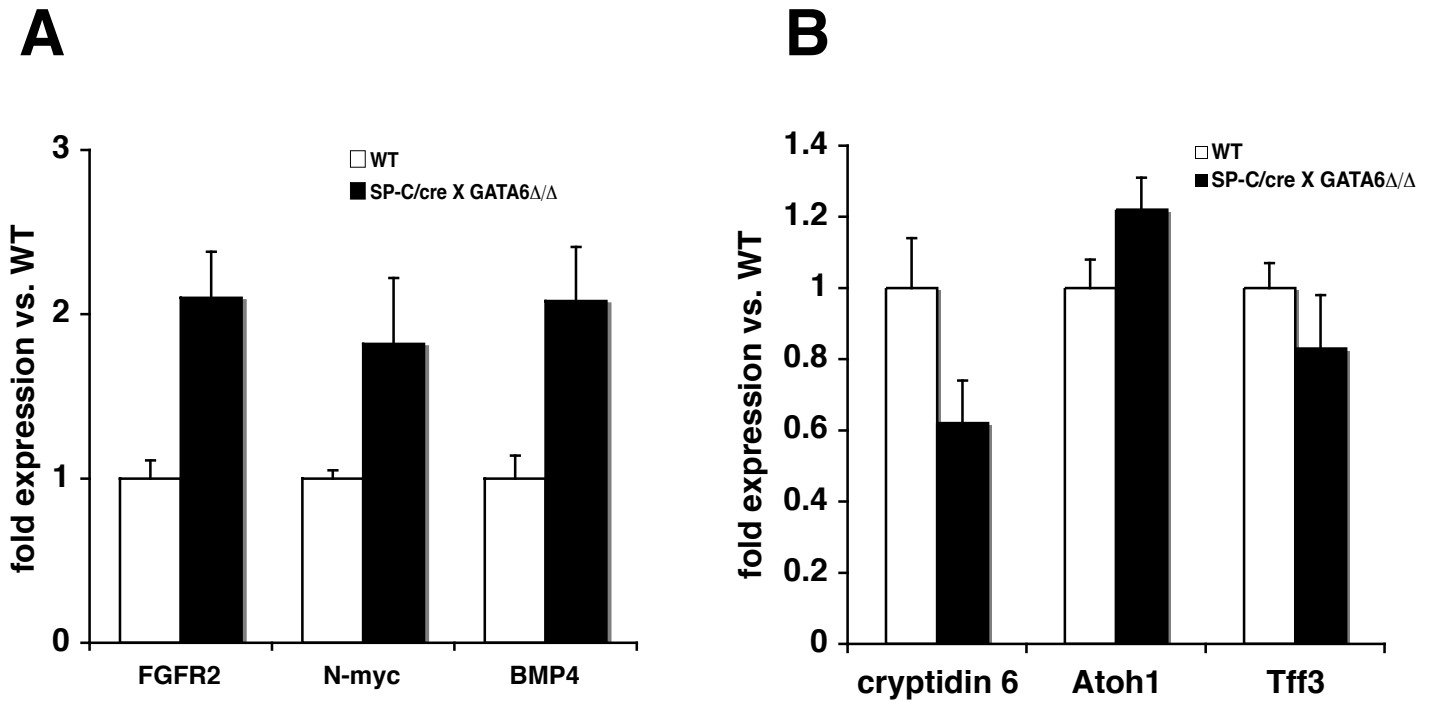

**Supplemental Figure 2. Expression of Wnt induced genes in *Gata6* <sup>$\Delta/\Delta$</sup> :*SP-C/cre***

**mutants.** Expression of the previously identified Wnt lung targets FGFR2, N-myc, and BMP4 is increased in *Gata6* <sup>$\Delta/\Delta$</sup> :*SP-C/cre* mutants as measured by Q-PCR (A). Genes induced by hyper-activation of  $\beta$ -catenin signaling in the lung including cryptidin 6 and Tff3 were slightly down-regulated whereas Atoh1 was slightly up-regulated in *Gata6* <sup>$\Delta/\Delta$</sup> :*SP-C/cre* mutants.

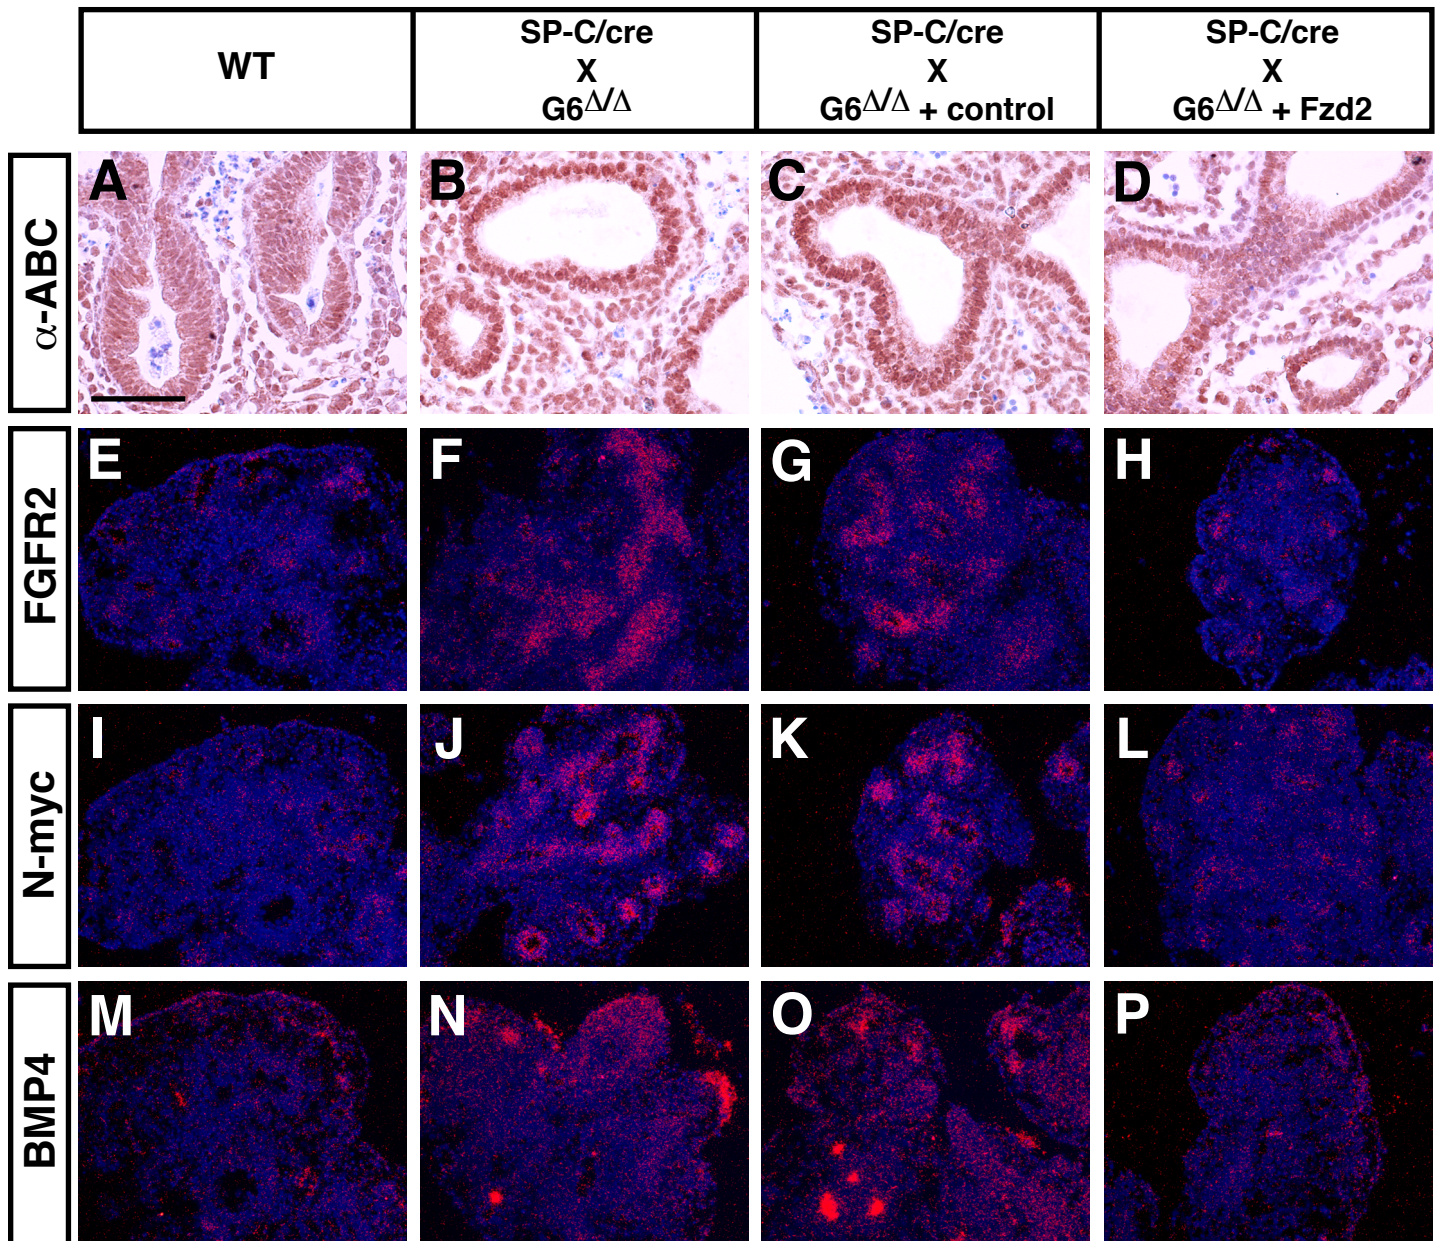

**Supplemental Figure 3. Expression of activated  $\beta$ -catenin and Wnt target genes FGFR2, N-myc, and BMP4 in lung explant rescue cultures.** Levels of activated  $\beta$ -catenin are increased in *Gata6<sup>Δ/Δ</sup>:SP-C/cre* mutant (B) and control plasmid transfected explants (C) as compared to wild-type explants (A). However, expression of activated  $\beta$ -catenin returns to wild-type levels upon re-expression of Fzd2 (D). Expression of FGFR2, N-myc, and BMP4 is increased in *Gata6<sup>Δ/Δ</sup>:SP-C/cre* mutant (F, J, N) and control plasmid transfected explants (G, K, O) as compared to wild-type explants (E, I, M). However, expression of all three of these genes returns to wild-type levels upon re-expression of Fzd2 (H, L, P). Scale bars=50  $\mu$ m.

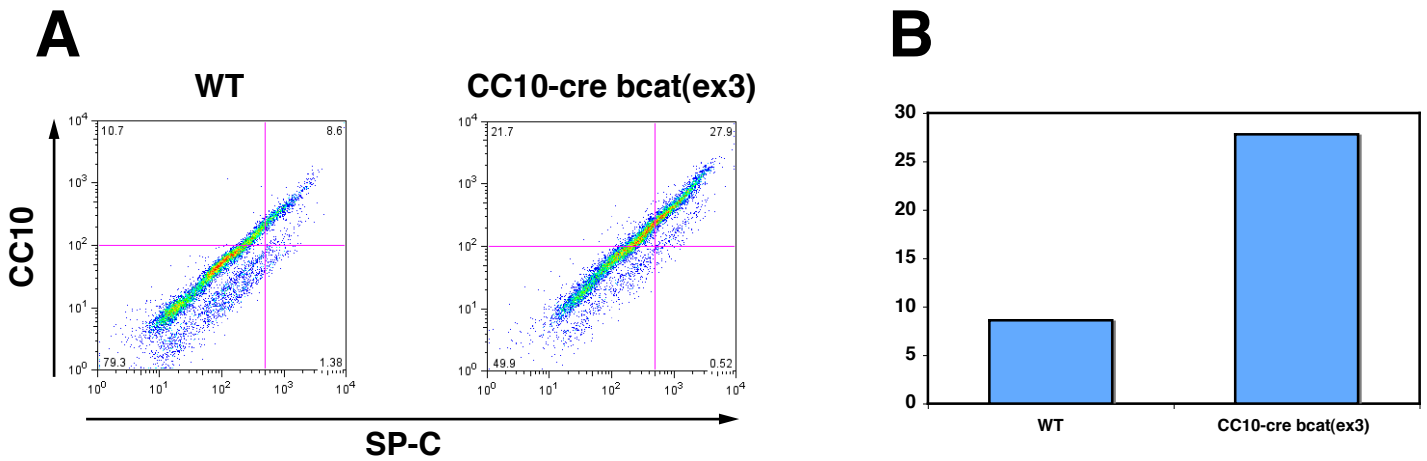

**Supplemental Figure 4. Increase in double positive BASCs in of  $\beta$ -**

***catenin* <sup>$\Delta$ ex3</sup>:*CC10/cre* mice after naphthalene injury.** FACS analysis was performed on wild-type and  $\beta$ -*catenin* <sup>$\Delta$ ex3</sup>:*CC10/cre* mice one week after naphthalene injury showing a greater than three-fold increase in BASCs upon expression of activated  $\beta$ -catenin (A).

Graphic depiction of the fold change in BASC numbers (B).

**Supplemental Table 1. Oligonucleotide sequences used for real-time quantitative PCR and ChIP.**

| <b>Gene</b>                 | <b>Primer sequence</b>                  |
|-----------------------------|-----------------------------------------|
| Wnt2 forward                | 5'-TCTTGAAACAAGAATGCAAGTGTC             |
| Wnt2 reverse                | 5'-GAGATAGTCGCCTGTTTTCTGAA              |
| Wnt7b forward               | 5'-GCATCCAAGGTCAACGCAAT                 |
| Wnt7b reverse               | 5'-CTCAGAGTCTCATGGTCCCTTTG              |
| Fzd2 forward                | 5'-CCGCTCTTCGTATACCTGTTC                |
| Fzd2 reverse                | 5'-CGGATGCGGAAGAGTGACA                  |
| N-myc forward               | 5'-TGTGTTGACATTAAGAATGTTGGTTTAC         |
| N-myc reverse               | 5'-TTTCCAAGGTCATGGCAGAAC                |
| BMP4 forward                | 5'-CCCTTTCCACTGGCTGATCA                 |
| BMP4 reverse                | 5'-GGGACACAACAGGCCTTAGG                 |
| FGFR2 forward               | 5'-GCTTCTCAGTGAGTTTTAATAACAGC           |
| FGFR2 reverse               | 5'-GAATGATGCTGGGCTTTTGC                 |
| Cryptidin 6 forward         | 5'-CCAGGCTGATCCTATCCAAAATAC             |
| Cryptidin 6 reverse         | 5'-CTTCTGGGTCTCCAAAAGAGACA              |
| Atoh1 forward and reverse   | ABI Taqman primers cat. # Mm00476035_s1 |
| Tff3 forward and reverse    | ABI Taqman primers cat. # Mm00495590_m1 |
| Fzd2 ChIP primer forward    | 5'-AGCAATCACGGACTGAGCAA                 |
| Fzd2 ChIP primer reverse    | 5'-CAGAAACCAGATGCCAAGAAAAC              |
| Fzd2 1.5kb promoter forward | 5'ATGGTACCTCTGGTAATTCTCCTGTCTCAACG      |
| Fzd2 1.5kb promoter reverse | 5'ATCTCGAGGATCCCAATTAGTCGGTTTCAAGG      |
